# Supplementary figures and images for: Dilated cardiomyopathy-associated RNA-binding motif protein 20 regulates long pre-mRNAs in neurons
Source: eLife journal article supplement (doi:10.7554/elife.104808), 2025-01-08

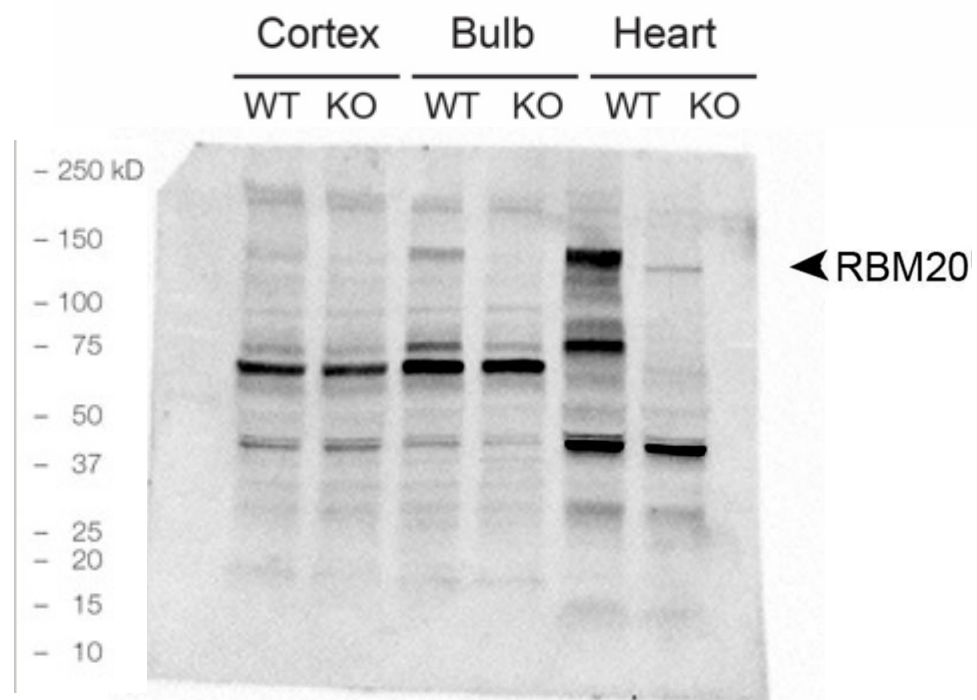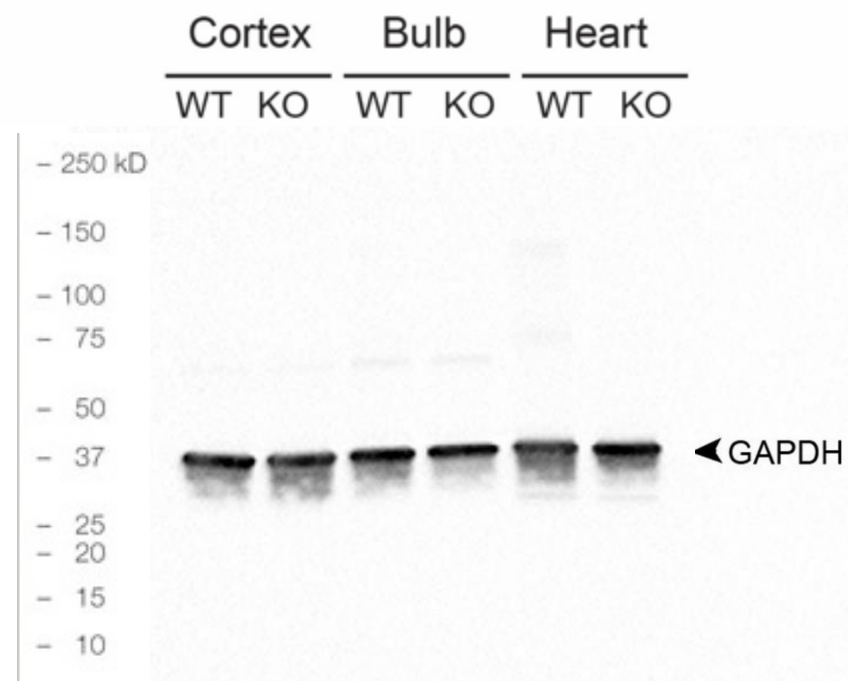

Supplement: fig1-figsupp1-data1 [file Figure S1 - Source file 1.pdf › Figure S1 - Source file 1.pdf]

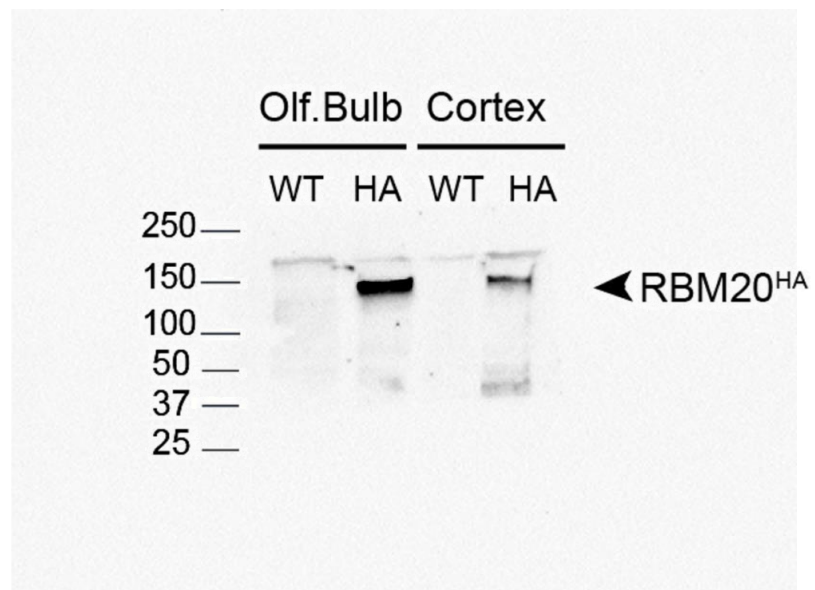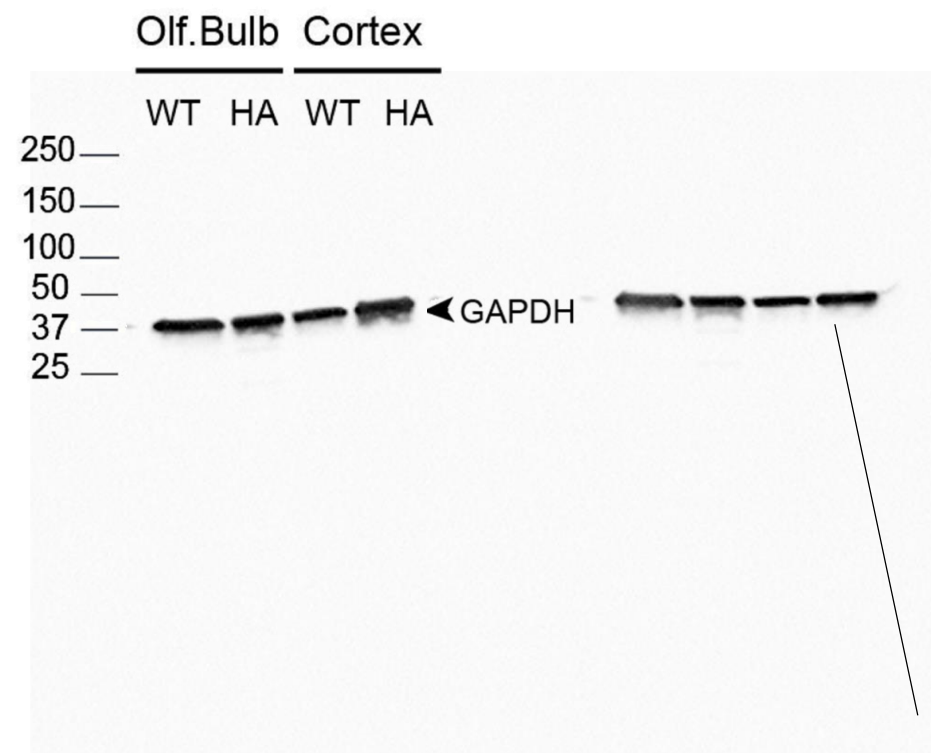

Gapdh for another blot

Supplement: fig2-data2 [file Figure 2 - Source file1.pdf › Figure 2 - Source file1.pdf]

Figure S4A

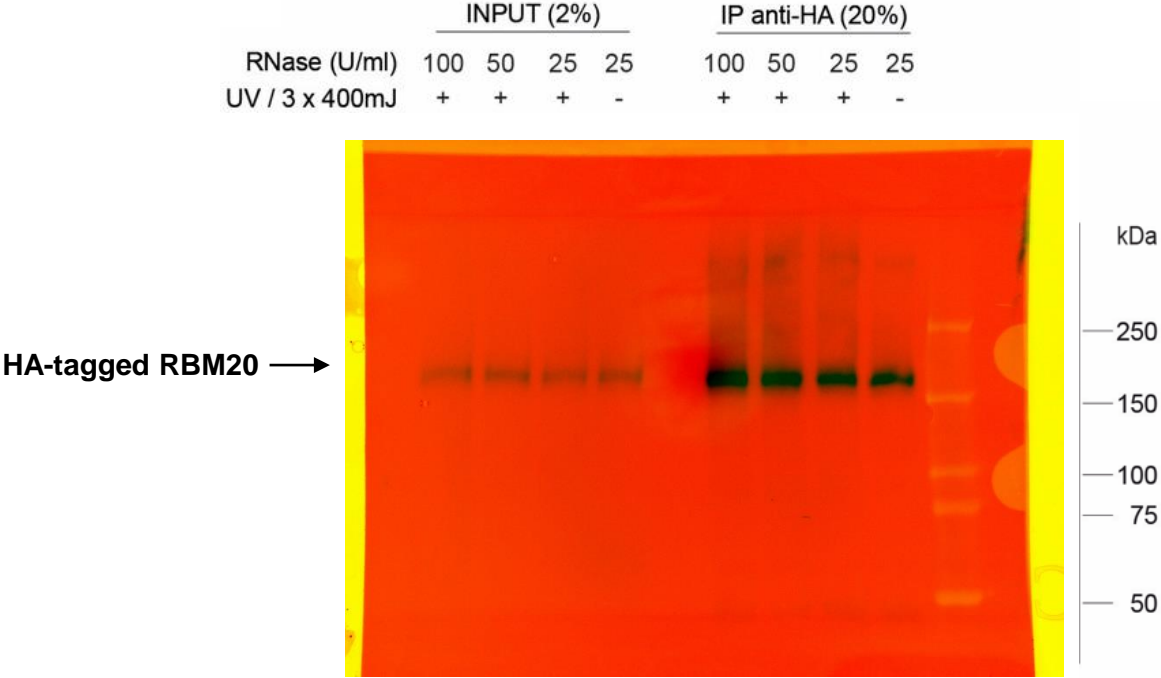

Figure S4B

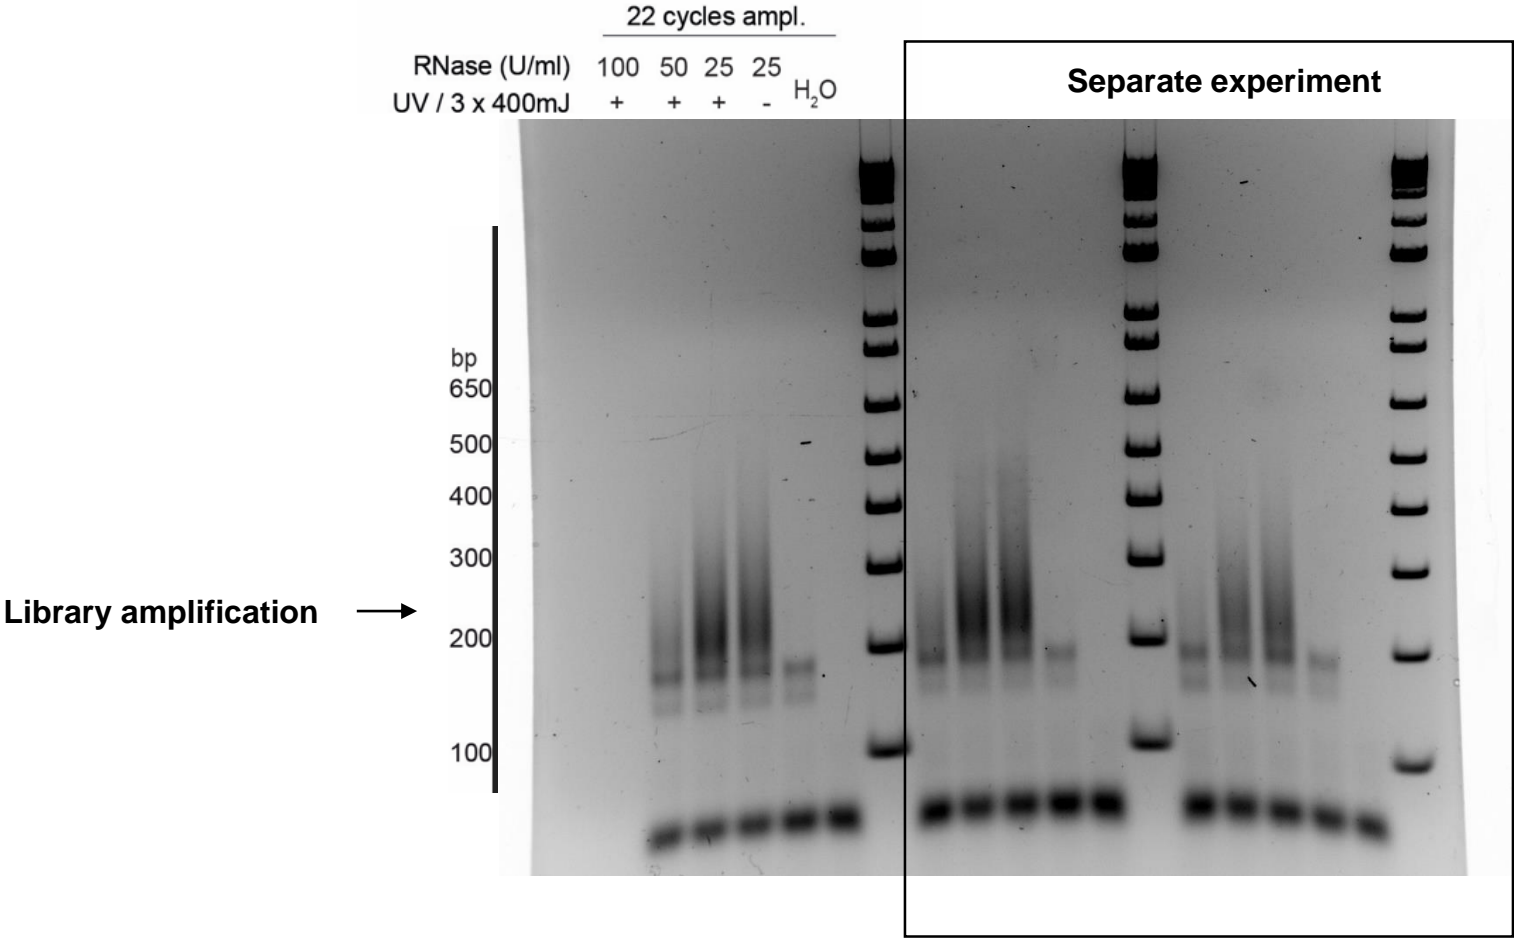

Supplement: fig3-figsupp1-data2 [file Figure_S4_-Source_file._Labeled_Figure_File-1.pdf › Figure_S4_-Source_file._Labeled_Figure_File-1.pdf]
